# Supplementary material for: The pre-synaptic vesicle protein synaptotagmin is a novel biomarker for Alzheimer’s disease
Source: Springer Nature journal article supplement (doi:10.1186/s13195-016-0208-8), 2016-10-03
Supplement: MOESM1 [file 13195_2016_208_MOESM1_ESM.pdf]

**Supplementary Table 1**

The intra-assay variability for the QC samples

| Analysed at         | Sample   |                                            | synaptotagmin (aa 215-223) | synaptotagmin (aa 238-245) |
|---------------------|----------|--------------------------------------------|----------------------------|----------------------------|
| The first occasion  | CV (QC1) | IP performed at the same occasion.         | 4.4% (N=4)                 | 4,4% (N=4)                 |
|                     | CV (QC1) | IP performed at the same occasion.         | 11% (N=4)                  | 11% (N=4)                  |
|                     | CV (QC1) | IP performed at two different occasions.   | 8.7% (N=8)                 | 10% (N=8)                  |
|                     | CV (QC2) | IP performed at the same occasion.         | 9.4% (N=3)                 | 7.4% (N=3)                 |
|                     | CV (QC2) | IP performed at the same occasion.         | 9.1% (N=3)                 | 13% (N=3)                  |
|                     | CV (QC2) | IP performed at two different occasions.   | 8.3% (N=6)                 | 9.7% (N=6)                 |
| The second occasion | CV (QC1) | IP performed at the same occasion.         | 7,7% (N=4)                 | 6,8% (N=4)                 |
|                     | CV (QC1) | IP performed at the same occasion.         | 13,5% (N=4)                | 0,13% (N=4)                |
|                     | CV (QC1) | IP performed at the same occasion.         | 13% (N=4)                  | 14% (N=4)                  |
|                     | CV (QC1) | IP performed at three different occasions. | 11% (N=8)                  | 12% (N=8)                  |

Abbreviations: coefficient of variation (CV); immunoprecipitation (IP); Quality control (QC)
